# Supplementary material for: A stable mode of bookmarking by TBP recruits RNA polymerase II to mitotic chromosomes
Source: eLife journal article supplement (doi:10.7554/elife.35621), 2018-06-25
Supplement: supp [file elife-35621-supp-v1.zip]

Archive with 19 entries (19 files):
- elife_poa_e35621_Figure_6_figure_supplement_1.ai
- elife_poa_e35621_Figure_2_figure_supplement_1.ai
- elife_poa_e35621_Figure_3_figure_supplement_2.ai
- elife_poa_e35621_Figure_4_figure_supplement_2.ai
- elife_poa_e35621_Supplementary_file_1.xlsx
- elife_poa_e35621_Figure_1_figure_supplement_2.ai
- elife_poa_e35621_Figure_5_figure_supplement1.ai
- elife_poa_e35621_Figure_3_figure_supplement_1.ai
- elife_poa_e35621_Figure_7_figure_supplement_2.ai
- elife_poa_e35621_Supplementary_file_2.xlsx
- elife_poa_e35621_Figure_7_figure_supplement_1.ai
- elife_poa_e35621_Figure_1_figure_supplement_1.ai
- elife_poa_e35621_Supplementary_file_3.xlsx
- elife_poa_e35621_Figure_6_figure_supplement_3.ai
- elife_poa_e35621_Figure_6_figure_supplement_2.ai
- elife_poa_e35621_Transparent_Reporting_File.pdf
- elife_poa_e35621_Figure_4_figure_supplement_3.ai
- elife_poa_e35621_Figure_4_figure_supplement_1.ai
- elife_poa_e35621_Figure_2_figure_supplement_2.ai
