# Supplementary material for: A stable mode of bookmarking by TBP recruits RNA polymerase II to mitotic chromosomes
Source: eLife journal article supplement (doi:10.7554/elife.35621), 2018-06-25
Supplement: supp [file elife-35621-supp-v1.zip › elife_poa_e35621_Supplementary_file_1.xlsx]

## Sheet: Sheet2
Number	Sequence	Description
1	GCGCGGTACCCCACTGCCTGGCTACAATTT	Fragment 1, TBP Left Homology Arm Forward Primer
2	GCTCACTTTTGCCTTGTTCTCAGCGCTAGCCATGATTCTCCCTTTCTTCAGTACTCAG	Fragment 1, TBP Left Homology arm Reverse primer, Overlapping PCR
3	CTAGCGCTAGCGCAGAAATCGGTACTGGCTTTCC	Fragment 2, Halo-Tag Forward Primer, overlapping PCR
4	CTAGCACGCGTTGGCTCGCCGGAAATCTCGAGCG	Fragment 2, Halo-Tag Reverse Primer, overlapping PCR
5	GTCCCTGTGTGCGAACCAAGTGGTACGCGTGACCAGAACAACAGCCTTCCACCTTA	Fragment 3, TBP Right Homology Arm Forward Primer, Overlapping PCR
6	GATATCTAGAAGTTTTGGACGACGGATCAC	Fragment 3, TBP Right Homology Arm Reverse Primer, Overlapping PCR
7	GCTCACTTTTGCCTTGTTCTCAGCGCTAGCCATGATTCTCCCTTTCTTCAGTACTCAG	Fragment 1, mAID-TBP Left Homology Arm Reverse Primer, Overlapping PCR
8	CTGAGTACTGAAGAAAGGGAGAATCATGGCTAGCGCTGAGAACAAGGCAAAAGTGAGC	Fragment 2, mAID-TBP mAID Forward Primer, overlapping PCR
9	TAAGGTGGAAGGCTGTTGTTCTGGTCACGCGTACCACTTGGTTCGCACACAGGGAC	Fragment 2, mAID-TBP mAID Reverse Primer, overlapping PCR
10	GTCCCTGTGTGCGAACCAAGTGGTACGCGTGACCAGAACAACAGCCTTCCACCTTA	Fragment 3, mAID-TBP Right Homology Arm Forward Primer, Overlapping PCR
11	ACATGAGTCACAGGAAACATGG	TBP screening forward primer
12	CCACGTTCACTACTGCATGG	TBP screening reverse primer
13	CACCGCAGGTAATAGAGCAAGAG	TBP guide RNA #1 Forward
14	AAACCTCTTGCTCTATTACCTGC	TBP guide RNA #1 Reverse
15	CACCGCCTTATGCTCAGGGCTTG	TBP guide RNA #2 Forward
16	AAACCAAGCCCTGAGCATAAGGC	TBP guide RNA #2 Reverse
17	CGGAATTCGCTATTAGAGCACAGGCGGTGCCC	Fragment 1, RPB1 Left Homology Arm Forward Primer
18	ATGGCCTCTAGACATGGCGAGGCAGGCGCGC	Fragment 1, RPB1 Left Homology Arm Reverse Primer
19	CGTCGACTGCAGCATGGCGGCGGCCCCCCCTCTGGAGACAGCGCATGCCCG	Fragment 3, RPB1 Right Homology Arm Forward Primer
20	GCATGCAAGCTTTACAAGTTTATTTCCCTCTCAGTCCCATGAC	Fragment 3, RPB1 Right Homology Arm Reverse Primer
21	ATGGCCTCTAGAGACTACAAAGACCATG	Fragment 2, HaloTag Forward Primer
22	CGTCGACTGCAGGCCGGAGTTATCGCTCTGAAAG	Fragment 2, HaloTag Reverse Primer
23	CACCGGGGGGGGCCACCCCCGTGCA	Rpb1 guide RNA #1 Forward
24	AAACTGCACGGGGGTGGCCCCCCCC	Rpb1 guide RNA #1 Reverse
25	CACCGCGGGGGTGGCCCCCCCTCCG	Rpb1 guide RNA #2 Forward
26	AAACCGGAGGGGGGGCCACCCCCGC	Rpb1 guide RNA #2 Reverse
27	CTGTCTCGTTGAACCGCAGC	Rpb1 screening forward primer
28	TGGCGCAGGCTTTTTGTAGC	Rpb1 screening reverse primer
