# Supplementary material for: A stable mode of bookmarking by TBP recruits RNA polymerase II to mitotic chromosomes
Source: eLife journal article supplement (doi:10.7554/elife.35621), 2018-06-25
Supplement: supp [file elife-35621-supp-v1.zip › elife_poa_e35621_Supplementary_file_2.xlsx]

## Sheet: Sheet1
	Number of Trajectories	Number of Trajectories ≥ 3	Number of Localizations	Localization per frame	Total number of jumps	Number of jumps for modeling
TBP Interphase	71625	6926	108513	0.125	36888	23344
TBP Mitosis	58035	5023	82341	0.102	24306	17367
Interphase Pol II
No treatment	45387	6394	78484	0.341	33097	21980
IAA	41712	5605	71948	0.3	30236	18979
Flavopiridol	61630	10699	117190	0.488	55560	36076
Triptolide	53155	10104	107479	0.448	54324	33516
IAA+Flavopiridol	33002	5001	63475	0.317	30473	16432
IAA+Triptolide	41136	6179	75120	0.32	33984	20686
Mitosis Pol II
No treatment	31509	5118	58261	0.243	26752	17258
IAA	18244	2461	32139	0.134	13894	8186
Flavopiridol	32030	5407	60017	0.25	27987	18350
Triptolide	33045	5451	62984	0.262	29939	18419
IAA+Flavopiridol	33002	5001	63475	0.317	30473	16432
IAA+Triptolide	19179	2697	34686	0.173	15507	9156
Halo only	78735	11792	135675	0.565	56940	42432
