# Supplementary material for: A stable mode of bookmarking by TBP recruits RNA polymerase II to mitotic chromosomes
Source: eLife journal article supplement (doi:10.7554/elife.35621), 2018-06-25
Supplement: supp [file elife-35621-supp-v1.zip › elife_poa_e35621_Supplementary_file_3.xlsx]

## Sheet: Sheet1
Untreated samples	Number of ERCC reads	Scaling factor
A rep 1	7355	0.136
M rep 1	7136	0.1401
M30 rep 1	5411	0.1848
M60 rep 1	7568	0.1321
A rep 2	6721	0.1488
M rep 2	7005	0.1428
M30 rep 2	5742	0.1742
M60 rep 2	6710	0.149
TBP degraded
A rep 1	5125	0.1951
M rep 1	5417	0.1846
M30 rep 1	5621	0.1779
M60 rep 1	6440	0.1553
A rep 2	5800	0.1724
M rep 2	6607	0.1514
M30 rep 2	5993	0.1669
M60 rep 2	6125	0.1633
